# Supplementary material for: Altered m6A RNA methylation governs denervation-induced muscle atrophy by regulating ubiquitin proteasome pathway
Source: J Transl Med. 2023 Nov 23;21:845. doi: 10.1186/s12967-023-04694-3 (PMC10668433; doi:10.1186/s12967-023-04694-3)
Supplement: Supplementary file 2 — Additional file 2. m6A methylation differential genes and their overlapping genes at different time points during denervation. [file 12967_2023_4694_MOESM2_ESM.csv]

combination	intersection_size	member
0.25h-vs-0h	4	Kdm4a;Cyp2j4;Cask;Mtdh
0.25h-vs-0h;0.5h-vs-0h;12h-vs-0h;24h-vs-0h	1	Cd99l2
0.25h-vs-0h;0.5h-vs-0h;1h-vs-0h;3h-vs-0h;6h-vs-0h;12h-vs-0h;24h-vs-0h;36h-vs-0h;72h-vs-0h	1	Myh9
0.25h-vs-0h;0.5h-vs-0h;1h-vs-0h;6h-vs-0h;36h-vs-0h;72h-vs-0h	1	LOC100910506
0.25h-vs-0h;0.5h-vs-0h;6h-vs-0h;24h-vs-0h	1	LOC103690017
0.25h-vs-0h;12h-vs-0h	1	Snx33
0.25h-vs-0h;12h-vs-0h;24h-vs-0h	1	Uchl5
0.25h-vs-0h;12h-vs-0h;36h-vs-0h;72h-vs-0h	1	Spin1
0.25h-vs-0h;1h-vs-0h	2	LOC108348189;Tbcd
0.25h-vs-0h;1h-vs-0h;12h-vs-0h;24h-vs-0h	1	Paxbp1
0.25h-vs-0h;1h-vs-0h;12h-vs-0h;36h-vs-0h	1	Romo1
0.25h-vs-0h;24h-vs-0h;36h-vs-0h	1	Myef2
0.25h-vs-0h;36h-vs-0h	3	LOC103690015;Zfp68;Aldh3a2
0.25h-vs-0h;36h-vs-0h;72h-vs-0h	1	Ogn
0.25h-vs-0h;3h-vs-0h;6h-vs-0h;24h-vs-0h;72h-vs-0h	1	Wbp11l1
0.25h-vs-0h;6h-vs-0h;12h-vs-0h;24h-vs-0h	1	Fam107a
0.25h-vs-0h;6h-vs-0h;24h-vs-0h;36h-vs-0h;72h-vs-0h	1	Slc6a6
0.25h-vs-0h;6h-vs-0h;36h-vs-0h	1	Rbbp5
0.25h-vs-0h;6h-vs-0h;72h-vs-0h	1	B3gntl1
0.25h-vs-0h;72h-vs-0h	2	Gstz1;Gspt1
0.5h-vs-0h	21	Tmem5;Ccdc86;Hes1;Ndufa1;Rnf19a;LOC108349083;LOC680835;Tp53i13;Exoc2;Dnmt1;Psd3;Zfp644;Ring1;NEWGENE_621802;LOC100912578;LOC103689977;LOC100910575;Arl5a;LOC100911727;Taf6;Tiam1
0.5h-vs-0h;12h-vs-0h	1	Lmod1
0.5h-vs-0h;12h-vs-0h;24h-vs-0h	1	Wdr20
0.5h-vs-0h;12h-vs-0h;24h-vs-0h;36h-vs-0h	2	Rhou;Plekha3
0.5h-vs-0h;12h-vs-0h;24h-vs-0h;72h-vs-0h	1	Btrc
0.5h-vs-0h;12h-vs-0h;36h-vs-0h	1	Clk2
0.5h-vs-0h;1h-vs-0h;24h-vs-0h;72h-vs-0h	1	Dcun1d2
0.5h-vs-0h;1h-vs-0h;36h-vs-0h	1	Heyl
0.5h-vs-0h;1h-vs-0h;3h-vs-0h	2	Hpdl;LOC100360977
0.5h-vs-0h;1h-vs-0h;6h-vs-0h;12h-vs-0h;24h-vs-0h	1	LOC100912282
0.5h-vs-0h;24h-vs-0h	3	Tdrd3;Bace1;Smad6
0.5h-vs-0h;24h-vs-0h;72h-vs-0h	1	Hnrnpab
0.5h-vs-0h;36h-vs-0h	4	Pcm1;Bhlhb9;Gsg2;Clcn7
0.5h-vs-0h;36h-vs-0h;72h-vs-0h	2	LOC100909750;Oma1
0.5h-vs-0h;3h-vs-0h;12h-vs-0h	1	Cacna2d1
0.5h-vs-0h;3h-vs-0h;12h-vs-0h;24h-vs-0h;36h-vs-0h	1	Ewsr1
0.5h-vs-0h;3h-vs-0h;12h-vs-0h;36h-vs-0h;72h-vs-0h	1	Irs2
0.5h-vs-0h;3h-vs-0h;36h-vs-0h	1	LOC103689985
0.5h-vs-0h;3h-vs-0h;6h-vs-0h	1	Fam198b
0.5h-vs-0h;3h-vs-0h;6h-vs-0h;12h-vs-0h;24h-vs-0h;36h-vs-0h	1	Tsc1
0.5h-vs-0h;3h-vs-0h;6h-vs-0h;12h-vs-0h;24h-vs-0h;36h-vs-0h;72h-vs-0h	1	She
0.5h-vs-0h;6h-vs-0h	1	Anp32e
0.5h-vs-0h;6h-vs-0h;12h-vs-0h;36h-vs-0h	1	Hat1
0.5h-vs-0h;6h-vs-0h;36h-vs-0h	2	Fry;Hectd1
0.5h-vs-0h;6h-vs-0h;72h-vs-0h	1	Hsp90aa1
0.5h-vs-0h;72h-vs-0h	1	Mrpl53
12h-vs-0h	276	Stard3;Kif2a;Scaf8;Trak1;Acyp1;Maml1;Sec63;LOC100911769;Ier5;Tfe3;Nol11;Gtf3c1;Tjp1;Ttyh3;Gtf2ird1;Fam127b;Hpf1;Kif23;Steap4;L2hgdh;LOC100911576;Tcf7;Mtg1;Mapk9;Slc25a46;Bcl2;Smg6;Mettl13;Eea1;Frat2;Araf;Dennd6a;LOC103693075;LOC100910827;Ahsa2;Zfp157;Ptger1;Tor1aip1;Chac1;Cenpb;Ssbp2;LOC100362814;Nhlrc1;Nfatc1;Uhrf1bp1;Rrs1;Nfkbib;Rgs16;Cops8;Klhl8;Hip1;Gli1;Cerk;Cd302;Inip;LOC103692273;Zfp513;Se…
12h-vs-0h;24h-vs-0h	86	LOC100909396;Krt10;Kctd11;Dchs1;LOC299312;LOC686774;Adh5;Chmp7;Caskin2;Wwox;Jph1;Mcm3;Zfp503;Smarca4;Nfatc2;Amigo2;Mcf2l;Far1;Slc39a13;Dicer1;Fbxl15;LOC690422;Gnb1;Shank3;Aak1;Irf2bp2;Igsf10;Bmpr1a;Prx;Tnni1;Ubn1;Cic;Cul5;Tm9sf1;Olfml2a;LOC102555672;Extl2;Schip1;Yipf5;LOC103690317;Xpnpep3;Ttll11;Acacb;Fv1;Dedd;Hps6;Pkig;Exoc8;Chd6;Snrnp200;Wars2;Pkd1;Raph1;Mtmr1;Asb13;Pogz;Zfp758;Jade2;Lrrc3b;Atg…
12h-vs-0h;24h-vs-0h;36h-vs-0h	17	Ubn2;Glyctk;Usp40;Slc30a1;Ntf4;Fbxw7;Rgs2;LOC103690502;Extl1;Slx4;Per2;Cdkn2aip;Eppk1;LOC102549898;Taf12;Oxsm;Meox2
12h-vs-0h;24h-vs-0h;36h-vs-0h;72h-vs-0h	13	Tnrc6a;Litaf;LOC100911248;Pogk;Dram2;Erfe;Vcan;Ttn;Rbm15b;Tecpr2;Cptp;LOC108348078;Plxdc2
12h-vs-0h;24h-vs-0h;72h-vs-0h	14	Zbtb42;Tnrc6c;Fsd1l;Cdh23;Gpam;Stim2;Arhgap12;Birc2;Ints3;Sppl3;Rbks;Cox20;Ros1;Fbxo30
12h-vs-0h;36h-vs-0h	30	Fhod3;Map4k5;Ppara;Aspa;LOC100911867;Arrdc3;Mdga1;Sos2;Phldb2;Tarbp1;Hps4;Papd7;Nfs1;Cyp2u1;Vps53;Otud4;Tbc1d1;Alpk2;Sfmbt1;Prrc2a;Zfc3h1;Ncoa5;Spns2;Lsmem2;Yars2;Maf;Coa6;Rexo1;Akap2;Chd1
12h-vs-0h;36h-vs-0h;72h-vs-0h	11	Mitf;Mcm6;Rsl1d1l1;Slc16a9;Neurl4;RGD1311164;Zscan26;Zfp189;Casp8ap2;Scaf11;Trit1
12h-vs-0h;72h-vs-0h	39	Rmnd5a;Fzd7;Zbtb11;Ccnyl1;Ubox5;Cwc25;Lpar6;Mppe1;RGD1310429;Lox;Ddx42;Mios;LOC103689992;Cyp51;RGD1561161;Slfn13;Tmpo;Setx;LOC103691457;Lig3;LOC108348080;Pprc1;Ncoa1;Ncoa2;Lig4;Fndc1;Tstd3;Sfpq;Mfhas1;Tdrd7;Ankhd1;Ccbe1;Lrch3;Dennd6b;Pcdhb17;Gmfb;Ythdc1;Cdk17;Zfp347
1h-vs-0h	51	Snx7;Ddx20;Sept10;Sntb1;Tns1;Trim47;Skil;LOC102548514;Slc25a36;Xpo7;Naca;Nphp1;Icoslg;Cecr2;Luzp1;Kpna1;LOC102553715;RGD1311595;Ski;Rwdd1;Sms;Leng8;Hectd3;LOC102550455;Katnb1;Lypd6b;Zdhhc18;Ufl1;Spire1;LOC103690020;Dnmbp;Stx16;Mx2;Eva1a;LOC501116;Leng9;Kdelc1;Dnajb1;Ddx52;Kansl1l;LOC100910308;Npy1r;Nlrx1;Zfx;LOC100911042;Gper1;RGD1307621;Ccdc22;Copb1;Zc3h10;Pfdn4
1h-vs-0h;12h-vs-0h	1	Nrarp
1h-vs-0h;12h-vs-0h;24h-vs-0h	1	Nectin3
1h-vs-0h;12h-vs-0h;24h-vs-0h;72h-vs-0h	1	Rnf213
1h-vs-0h;12h-vs-0h;36h-vs-0h	2	Nupr1;Rdh13
1h-vs-0h;12h-vs-0h;72h-vs-0h	2	Apc;Rcbtb1
1h-vs-0h;24h-vs-0h	3	LOC100360552;L3mbtl3;Cttnbp2nl
1h-vs-0h;24h-vs-0h;72h-vs-0h	2	Ckap5;Gse1
1h-vs-0h;36h-vs-0h	6	LOC100909784;Gsap;Jpx;Tnk2;LOC685067;Frmd8
1h-vs-0h;3h-vs-0h	1	LOC108348147
1h-vs-0h;3h-vs-0h;12h-vs-0h;24h-vs-0h;36h-vs-0h	1	Rin2
1h-vs-0h;3h-vs-0h;6h-vs-0h;12h-vs-0h;36h-vs-0h;72h-vs-0h	1	LOC100911034
1h-vs-0h;3h-vs-0h;6h-vs-0h;24h-vs-0h	1	Pdia5
1h-vs-0h;3h-vs-0h;6h-vs-0h;36h-vs-0h;72h-vs-0h	1	Dll1
1h-vs-0h;3h-vs-0h;72h-vs-0h	1	Angptl4
1h-vs-0h;6h-vs-0h	2	LOC100910732;Zmynd8
1h-vs-0h;6h-vs-0h;12h-vs-0h	3	Chd7;Chst12;Pkp4
1h-vs-0h;6h-vs-0h;12h-vs-0h;36h-vs-0h	1	Rab11fip5
1h-vs-0h;6h-vs-0h;12h-vs-0h;36h-vs-0h;72h-vs-0h	1	Abi3bp
1h-vs-0h;6h-vs-0h;12h-vs-0h;72h-vs-0h	1	Ankrd11
1h-vs-0h;6h-vs-0h;24h-vs-0h;36h-vs-0h;72h-vs-0h	2	Edem3;Rbm39
1h-vs-0h;6h-vs-0h;36h-vs-0h	5	Asap1;RGD1311946;Arid5b;Fli1;Kat6a
1h-vs-0h;6h-vs-0h;36h-vs-0h;72h-vs-0h	2	Zbtb7a;Fxyd5
1h-vs-0h;6h-vs-0h;72h-vs-0h	1	Ppargc1a
1h-vs-0h;72h-vs-0h	1	Asb2
24h-vs-0h	286	LOC102553500;Ddx39a;Zfp292;H1f0;Ears2;Itga8;Rabl3;Taok1;Dapk1;Syde1;Epc1;Tmem170b;Perm1;Hsd3b7;Cdc6;Noc4l;Rexo4;Shroom4;Klhl25;Rassf3;Top2b;Npr3;Nop9;Fam131c;Fzd9;Arap1;Csgalnact1;Anapc1;Tbx15;F8;Hr;Chaf1a;Dupd1;Mrpl1;Ube2i;Lmnb2;Myocd;Mapkbp1;Crebrf;Lrrc30;LOC108348106;Eif2ak3;Atp2c1;Parp10;Lemd3;Fars2;Sfrp5;Naa40;Tmem246;Ubiad1;Six2;NEWGENE_1582994;Aga;Nuak1;RGD1306746;Birc5;Emilin2;Crybg3;LOC1…
24h-vs-0h;36h-vs-0h	55	Ank3;LOC100909761;Camkk1;Khdrbs3;Prmt3;Ttc30b;Slc7a6;F2r;Sfswap;Slc35f6;Aqp4;Tagap;Klhl34;Slc16a6;Zfp259;Kmt2d;Ncor1;LOC100912042;Grem2;Tead1;Rnf122;Trmt44;Ppip5k1;Ppp1r12a;Adprhl1;Apbb1;Mtx3;Ino80d;LOC108351802;Sdf2l1;Mxd3;Nudt13;Aptx;Tcaf1;Dhrs7b;Vash1;Bcor;Nuf2;Zfp445;Spata13;Gtpbp6;Med13l;Rab8b;Lonp1;Slc2a12;LOC100909505;Krit1;Sorbs1;Rnd2;Smpd3;Gramd4;LOC103690154;Cutc;Trmt12;Nacc2
24h-vs-0h;36h-vs-0h;72h-vs-0h	18	Ypel2;Arhgap45;Ube2ql1;Vstm4;Tgfb2;Prmt9;RT1-T24-3;Akap6;Ankrd50;RGD735065;Phc1;Zfp770;Tti1;Egln1;Kcnc1;Ranbp6;Egf;Cpt1a
24h-vs-0h;72h-vs-0h	32	Dap3;Tll1;Meox1;LOC102546572;Ccr5;Zfp64;Usp32;Map3k4;Rhobtb2;LOC100912571;Mthfr;Txlng;Erbin;Elk3;Ctbp2;Tmem161b;Cep131;Slc41a3;Fzd6;Naa25;Ubtf;Trim59;Rab7b;Ino80c;Dnajc27;Tnik;LOC100912115;Vkorc1l1;Nipbl;Sesn2;Vcpip1;Exosc6
36h-vs-0h	302	Aaed1;Trim11;Etv1;Usp31;Csgalnact2;Pip4k2b;Mblac1;Ift52;Lamc3;Ano10;Engase;Kcnq5;RGD1311188;Ibtk;Rb1cc1;Cep162;Renbp;Bud13;Asb18;Adamtsl4;LOC102553847;Usp7;Tspan9;LOC103690063;Adam1a;Esrrg;Tnfsf10;Plcl2;Clec1a;Pon3;Gdi1;Sptlc2;Zfp692;Usp8;Usp1;Ppp2r2a;Msrb3;Rcc2;Cdkn2b;Ccdc50;Arhgap27;Ccnd2;Gorab;Tor1b;Cyp4f39;Wdr53;Gab2;Smarcb1;Rbm15;Cwc22;Trim33;Ammecr1l;Cog8;Acox3;Pkn3;Mier2;Kdsr;P2ry1;Sepsecs…
36h-vs-0h;72h-vs-0h	95	LOC102555426;Nek3;Rfx7;Rhobtb3;Tbrg4;Adgre1;Gpm6b;Myl12b;Adamts12;Aoc3;Bcs1l;Gtf2a1;Oxct1;Prkag2;Tfam;LOC100363361;Nono;Hipk4;Atp8a1;Crem;Hoxc9;Tma7;Rell1;LOC100362980;Cwf19l2;Nek2;B3galt5;Ehbp1;Ebp;Lnx2;Edem2;Atp6v1b2;Vps52;Rsbn1l;Sucla2;Sgo2;LOC681282;Ppp1r21;LOC103691931;Hs6st1;Etv6;Tbc1d5;Cpped1;Gfpt2;Mga;Swap70;Ggnbp2;Plat;Zfp128;Cflar;Kbtbd3;Pias2;Thrap3;LOC680039;Zcchc8;Stard9;Pfas;LOC1025…
3h-vs-0h	13	Lancl1;Slc12a2;Hpgd;LOC100911744;Antxr2;Brd2;LOC679739;Xylt2;LOC103690018;Dhx15;Spg20;Banp;Smarcc2
3h-vs-0h;12h-vs-0h	2	Fgf1;Fam188b
3h-vs-0h;12h-vs-0h;24h-vs-0h	2	Cited4;Mina
3h-vs-0h;12h-vs-0h;24h-vs-0h;72h-vs-0h	1	Fam114a1
3h-vs-0h;12h-vs-0h;36h-vs-0h	1	LOC100910771
3h-vs-0h;12h-vs-0h;36h-vs-0h;72h-vs-0h	1	Spen
3h-vs-0h;24h-vs-0h	3	Dusp10;Herc6;Chd8
3h-vs-0h;24h-vs-0h;36h-vs-0h	3	Slmap;Tbc1d9b;Igsf8
3h-vs-0h;24h-vs-0h;72h-vs-0h	2	Sugp2;Maml2
3h-vs-0h;36h-vs-0h	1	RGD1559731
3h-vs-0h;36h-vs-0h;72h-vs-0h	2	Cmtr1;Brms1
3h-vs-0h;6h-vs-0h	4	Morc4;Tcof1;Cdkl5;Hyal3
3h-vs-0h;6h-vs-0h;12h-vs-0h	3	Cpsf2;Ehmt1;Micu1
3h-vs-0h;6h-vs-0h;12h-vs-0h;24h-vs-0h	1	Mtmr4
3h-vs-0h;6h-vs-0h;12h-vs-0h;24h-vs-0h;36h-vs-0h;72h-vs-0h	1	Nynrin
3h-vs-0h;6h-vs-0h;12h-vs-0h;24h-vs-0h;72h-vs-0h	2	Pfkfb4;Tet2
3h-vs-0h;6h-vs-0h;12h-vs-0h;36h-vs-0h;72h-vs-0h	2	Uhrf2;LOC103694328
3h-vs-0h;6h-vs-0h;24h-vs-0h;36h-vs-0h	1	LOC100910418
3h-vs-0h;6h-vs-0h;24h-vs-0h;72h-vs-0h	1	Dync1h1
3h-vs-0h;6h-vs-0h;36h-vs-0h	1	Mff
3h-vs-0h;6h-vs-0h;36h-vs-0h;72h-vs-0h	1	Mfn2
3h-vs-0h;6h-vs-0h;72h-vs-0h	1	Wipf2
6h-vs-0h	155	Hes6;Lrig1;Pkdcc;Errfi1;Herc2;Pcsk7;Ptpn2;Gak;Rmdn3;Sema3a;Nav1;Basp1;Sorbs3;Large1;Map3k6;Trim63;LOC102555814;Zfp422;LOC108348120;Phf21a;Kbtbd7;Larp4;Col16a1;Golt1b;Rbm33;Trub1;Whamm;Dpcd;Afg3l1;Terf2;Brpf1;LOC103693474;Cbx4;Bmp2k;Zfp397;Adamtsl2;Slco5a1;Hook3;Rgl1;LOC102555870;Pus1;Pdxdc1;Adamts14;Trib2;Chodl;Arhgap17;C5ar1;Lrrc8d;Strn3;Kctd6;Slc46a3;Zfp354c;LOC102556297;Lrp1;Arhgef2;Tox4;Mtss1…
6h-vs-0h;12h-vs-0h	26	Tex9;Cnnm4;Bbc3;Ksr1;LOC103691033;Nrp2;Fmr1;Fam26e;Pum3;Tmem106c;LOC100302372;Rmnd1;Myh3;Brd4;Robo4;Rsf1;Mmgt2;Zfp606;Rgs3;Zzz3;Arl11;Slc22a23;Phospho2;Degs1;Itch;Rest
6h-vs-0h;12h-vs-0h;24h-vs-0h	7	Sacs;Sox6;LOC100912622;Hip1r;Arl8a;Osbpl11;Usp54
6h-vs-0h;12h-vs-0h;24h-vs-0h;36h-vs-0h	6	LOC100909675;Gtf2e1;Zfp41;Msh6;Setd5;Ccdc149
6h-vs-0h;12h-vs-0h;24h-vs-0h;36h-vs-0h;72h-vs-0h	11	Aptr;Hspa1l;Gapvd1;Hnrnpu;Mospd1;Bptf;Pdzd8;Abhd17b;Strn;Mtrr;Klf3
6h-vs-0h;12h-vs-0h;24h-vs-0h;72h-vs-0h	8	Zbed6;Peak1;Pank3;Tesc;Hoxc11;Pm20d2;Fam8a1;Rnft1
6h-vs-0h;12h-vs-0h;36h-vs-0h	9	Actn1;Dgcr8;Prepl;Rai1;Mettl21a;Myh7;Kif13b;LOC102548966;Ash1l
6h-vs-0h;12h-vs-0h;36h-vs-0h;72h-vs-0h	15	R3hdm1;Fgfr1op;Mcm7;Hmgn5b;Adamts8;Rere;Rps6;Senp3;Pik3ap1;Casz1;Hbb;RGD1306556;Tmem131;Ppil4;LOC102552822
6h-vs-0h;12h-vs-0h;72h-vs-0h	5	Tnpo3;LOC298139;Gprc5c;Sh3rf1;Uvrag
6h-vs-0h;24h-vs-0h	13	Mpdz;Tp53bp2;Klhl12;Pdzd2;Mettl11b;Zbtb38;Obsl1;Myo9b;P2rx6;Pdcd11;Mid1;Faf2;Phrf1
6h-vs-0h;24h-vs-0h;36h-vs-0h	7	RGD1305178;Poglut1;Dzip1;Zbtb39;Rbm41;Erc1;Cdk19
6h-vs-0h;24h-vs-0h;36h-vs-0h;72h-vs-0h	11	RGD1563091;Champ1;Orc2;Phf3;MGC95208;Msl2;Parp9;Ugcg;Kbtbd2;Stx17;Nagk
6h-vs-0h;24h-vs-0h;72h-vs-0h	8	LOC100174910;Man2a1;LOC102551211;Trim68;Rnf152;Tiparp;Golgb1;Prdm2
6h-vs-0h;36h-vs-0h	25	Nfyc;Bcl9l;Zc3h13;Tarbp2;Csnk1g3;Stip1;Ccdc88c;Phtf1;Ankrd17;Col22a1;Arid1a;Snx2;Akr1c14;LOC103690039;Ash2l;Aida;LOC100912353;Usf3;LOC100912604;Dvl2;Arhgef39;Hspa12a;Clcn3;Zbtb8os;Dennd1a
6h-vs-0h;36h-vs-0h;72h-vs-0h	25	Cers2;Tpr;Sars2;LOC361346;Kdelc2;Ssc5d;Osgin2;Asph;Zfp637;Cep295;Sertad2;St3gal5;Ppp1r13b;U2surp;RGD1306941;Med12;Peg3;Agbl1;Zfp148;Diexf;Tradd;Hnrnph3;Yipf7;Npat;LOC100912293
6h-vs-0h;72h-vs-0h	38	Rgs4;Nudt16l1;Slc25a15;Ankrd12;Lgr4;Nrip1;Abl1;Kmt5b;Itsn2;Plekhg2;Wwc2;Wasf2;Ice1;Ppp6r3;Fam216a;Itgb5;Rpap1;Tbk1;Arhgap24;Sema6a;Ep300;Prg4;Polr2i;Qser1;Jarid2;LOC100359816;Btbd8;Sp1;Sfrp1;Tmem63b;LOC102554909;Kmt2a;Zfp870;Myo10;Afap1l1;Cdc42bpa;Angpt1;Tbc1d2b
72h-vs-0h	402	Tgs1;Atp2b3;Lrrc45;Map3k7;Pex12;Tal2;Lhx2;Hspa2;Trim7;Nup214;Chst2;Atg4c;Rasgrp3;Hcn2;Asb7;Fam126b;Thrb;Aacs;Kdm2b;Zc3hav1;LOC102548910;Akr1b10;Pik3r4;Asxl2;Foxp3;Vasn;Evc;Kbtbd12;Usp9x;Ccdc3;Rbm4b;Fuca2;Adipoq;Ptn;Ift140;Ube3a;Plcb3;Tifab;Mterf1;Ppp1r3d;Tnrc18;Crabp2;Slc8b1;LOC102551374;Nqo2;Hba-a1;Pknox2;Agk;Sfxn3;LOC103691188;Ager;Syk;Mnt;Zfand6;Slc43a2;Gls;Zc3h12c;Lamc2;Fgf2;LOC102548467;Anks…
